# Supplementary material for: Editorial Note: Clinical and Parasitological Protection in a Leishmania infantum-Macaque Model Vaccinated with Adenovirus and the Recombinant A2 Antigen
Source: PubMed Central journal article supplement (PMC11392534; doi:10.1371/journal.pntd.0012499), 2024-09-12

# S1 File

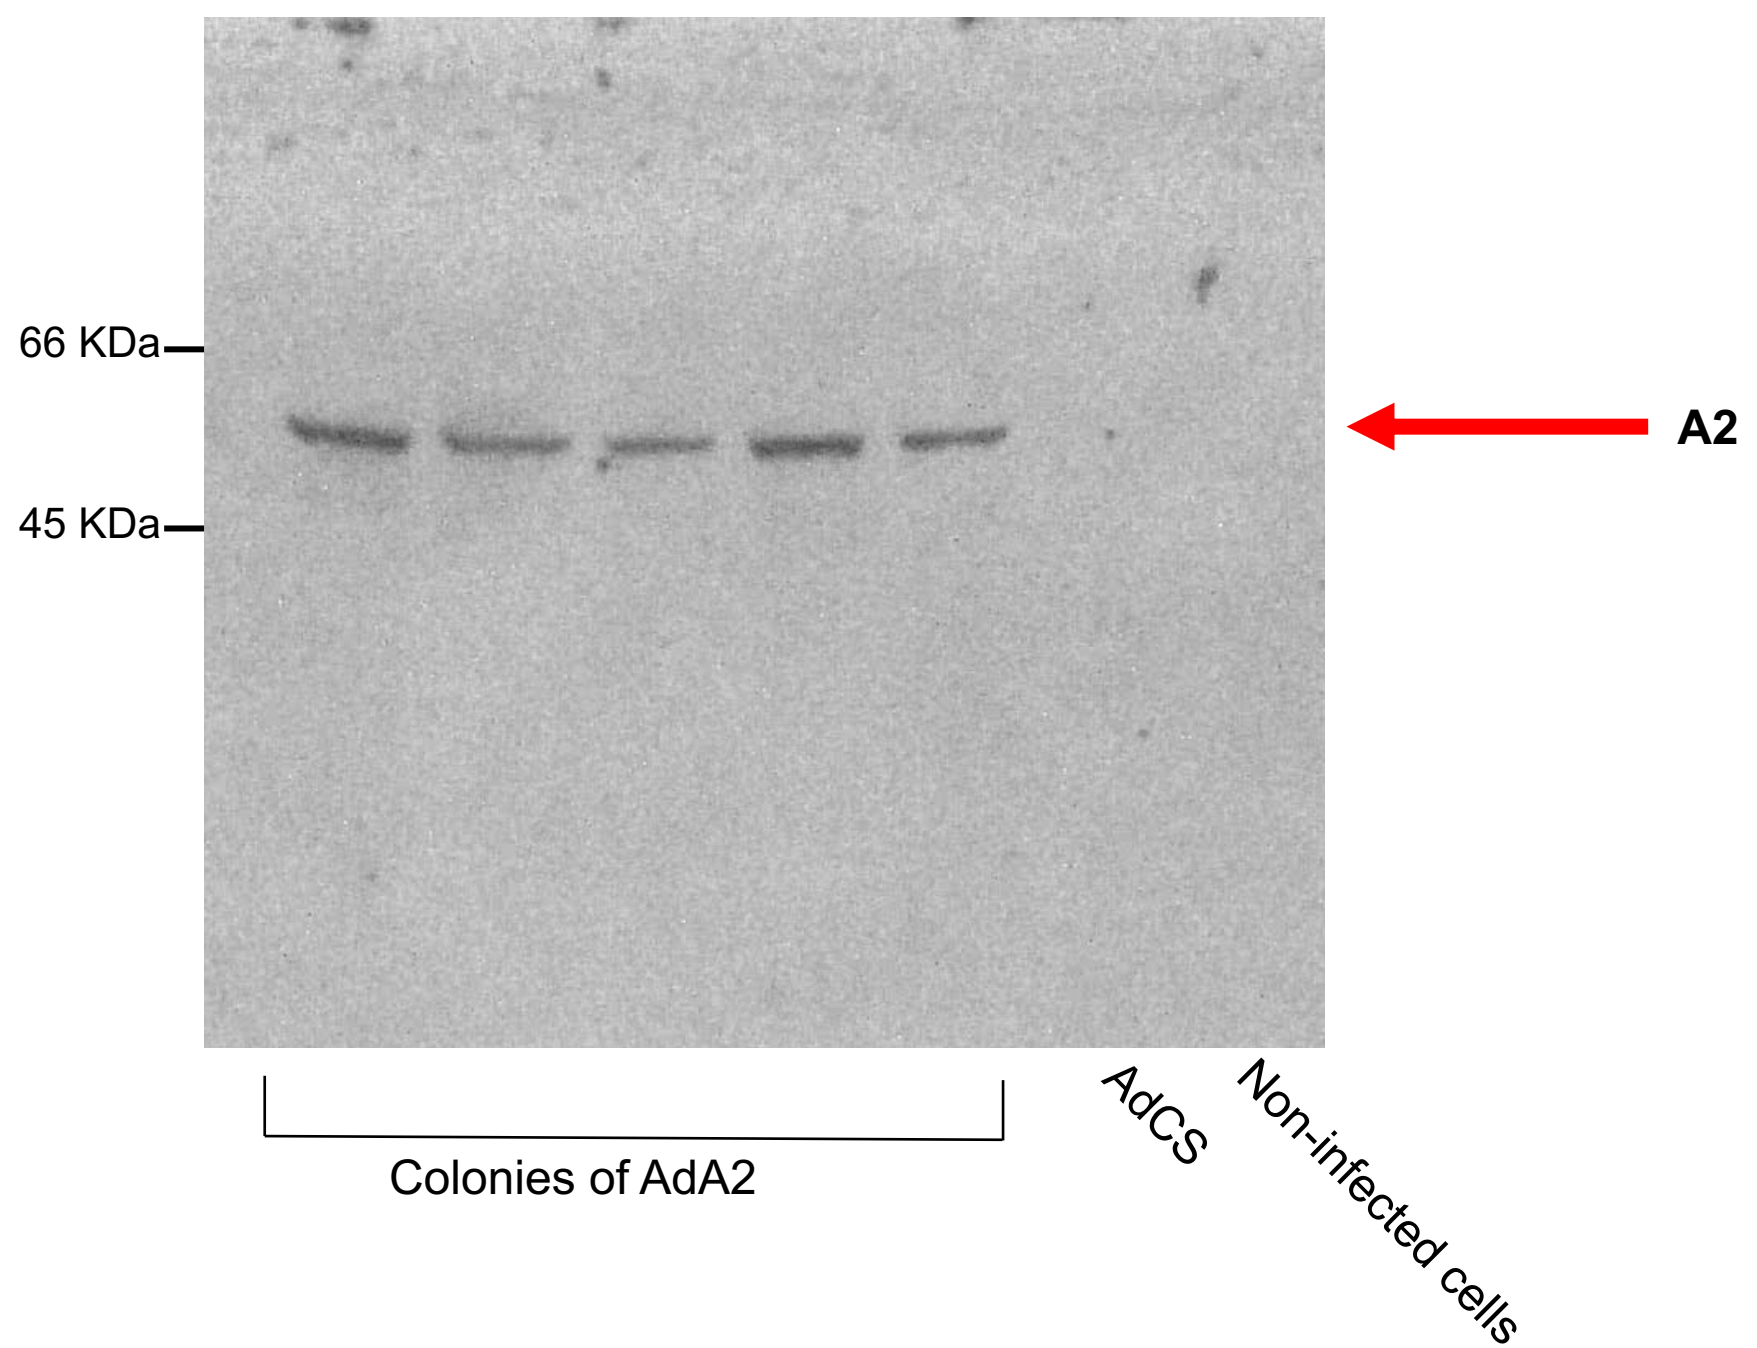

Supplement: pntd.0012499.s001.pdf [file pntd.0012499.s001.pdf]
